# Supplementary material
Source: publisher figshare collection journal article supplement (https://asha.figshare.com/articles/dataset/_/11800779)
Supplement: Supplementary file 1 [file 1]

**Supplemental Material S1.** Items from the Narrative Assessment Protocol (Original Version).

| Item                       |
|----------------------------|
| Compound sentence          |
| Complex sentence           |
| Negative sentence          |
| Interrogative sentence     |
| Elaborated noun phrase     |
| Compound noun              |
| Prepositional phrase       |
| Adverb                     |
| Advanced modifier          |
| Pluralized noun            |
| Possessive noun            |
| Tier 2 noun                |
| Auxiliary verb + main verb |
| Copula BE verb +           |
| Irregular past-tense verb  |
| Tier 2 verb                |
| Compound verb              |
