# Supplementary material
Source: publisher figshare collection journal article supplement (https://asha.figshare.com/articles/dataset/_/11800779)
Supplement: Supplementary file 2 [file 1]

**Supplemental Material S2.** Complete Narrative Assessment Protocol-2 item pool tested.

| Item                                 | Description                                                                                                                    | Example                                         |
|--------------------------------------|--------------------------------------------------------------------------------------------------------------------------------|-------------------------------------------------|
| Interrogative: Tag Questions         | Declarative sentence made into an interrogative by adding a tag (“won’t you?” “didn’t he?”) at the end                         | “The frog jumped high, right?”                  |
| Interrogative: Yes/No Questions      | Interrogative sentence that can be answered with “yes” or “no”                                                                 | “Do you like to make lemonade?”                 |
| Interrogative: <i>Wh</i> - Questions | Interrogative sentence that starts with a <i>wh</i> - word (“who,” “what,” “when,” “where,” “what,” “which,” “how”)            | “Why are you hiding in my boot?”                |
| Prepositional Phrase                 | Phrase consisting of a preposition, an object, and any associated adverbs or adjectives                                        | “He put it <u>in his boot</u> .”                |
| Compound Sentence                    | Sentence containing a <i>coordinating conjunction</i> (e.g., “and,” “but,” “or”) used to join two or more independent clauses  | “The owl came out <i>but</i> the boy ran.”      |
| Complex Sentence: Infinitive Form    | Sentence containing at least one subordinate infinitive clause                                                                 | “She wanted to leave.”                          |
| Complex Sentence: <i>Let</i> Form    | Sentence containing at least one subordinate clause with the verb “let”                                                        | “Let’s tell him about it.”                      |
| Complex Sentence: Coordinated Form   | Sentence containing at least one subordinate clause linked by a coordinating conjunction (e.g., “and,” “but,” “or”)            | “He read the book and watched TV.”              |
| Complex Sentence: Subordinated Form  | Sentence containing at least one subordinate clause linked by a subordinating conjunction (e.g., “after,” “because,” “unless”) | “Because she is so sad, we gave her a present.” |

| Item                                                                  | Description                                                                                                                                                                              | Example                  |
|-----------------------------------------------------------------------|------------------------------------------------------------------------------------------------------------------------------------------------------------------------------------------|--------------------------|
| Pluralized Noun                                                       | Noun with plural marker attached (e.g., /s/, /z/, /Iz/) or an irregular plural (e.g., “children,” “sheep”), not including nouns without singular forms (e.g., “pajamas”)                 | “bears”                  |
| Elaborated Noun Phrase With 1 Adjective                               | Noun phrase consisting of one adjective preceding a singular or plural noun with no demonstrative or quantifier determiners                                                              | “The happy bear”         |
| Elaborated Noun Phrase With 1 Demonstrative or Quantifier Determiners | Noun phrase in which a noun is preceded by or immediately followed by a demonstrative (“this,” “that,” “those”) or quantifier (“every,” “nine,” “another”) determiner with no adjectives | “He added three scoops.” |
| Elaborated Noun Phrase 2                                              | Noun phrase consisting of two or more adjectives preceding a singular or plural noun or consisting of one adjective plus at least one demonstrative or quantifier determiners            | “The happy fuzzy bear”   |
| Elaborated Noun Phrase With Possessive Determiner                     | Noun phrase in which noun is preceded by a possessive determiner (e.g., “my,” “her,” “your”)                                                                                             | “her mom”                |
| Post-Noun Modifier                                                    | Noun phrase consisting of one or more modifiers after a singular or plural noun                                                                                                          | “bear who ran”           |
| Possessive Form                                                       | Noun with possessive marker attached                                                                                                                                                     | “boy’s”                  |
| Compound Word                                                         | Two words joined to form a new word, or two separate words that represent a common word (e.g., “laundry basket,” “tool box”)                                                             | “baseball”               |
| Tier 2 Noun                                                           | Noun with at least 8 letters                                                                                                                                                             | “dinosaur”               |
| Tier 2 Adjective                                                      | Adjective with at least 8 letters                                                                                                                                                        | “beautiful”              |

| Item                                       | Description                                                                                                                                  | Example                                             |
|--------------------------------------------|----------------------------------------------------------------------------------------------------------------------------------------------|-----------------------------------------------------|
| Pronoun Error<br>[reverse scored]          | The improper use of a pronoun                                                                                                                | “Him was thirsty.”                                  |
| Auxiliary Verb + Main Verb                 | Auxiliary verb used in contracted or uncontracted form in present progressive or past progressive verb construction                          | “The boy is yelling at the dog.”                    |
| Modal Verb                                 | Auxiliary verb used to indicate likelihood, ability, permission, and obligation (e.g., “may,” “must,” “would,” “could,” “can,” etc.)         | “The bear may decide to make his friends lemonade.” |
| Copula                                     | Verb form of BE used as the main verb in a clause                                                                                            | “The frog was here.”                                |
| Regular Past-Tense Verb                    | Verb with regular past-tense marker attached (-ed or -d)                                                                                     | “The dog walked.”                                   |
| Irregular Past-Tense Verb                  | Verb that marks past tense irregularly                                                                                                       | “The dog fell.”                                     |
| Negative Verb Form                         | Sentences using “no” or “not,” included contracted forms, to negate the verb in the sentence                                                 | “The frog can't go there”                           |
| Tier 2 Verb                                | Verb with at least 8 letters                                                                                                                 | “galloped”                                          |
| Tier 2 Adverb                              | Adverb with at least 8 letters                                                                                                               | “excitedly”                                         |
| Place Adverb                               | Adverb relating to place                                                                                                                     | “She went upstairs.”                                |
| Time Adverb                                | Adverb relating to time                                                                                                                      | “Soon, it was time to go.”                          |
| Manner or Degree Adverb                    | Adverb relating to manner or degree                                                                                                          | “The tiger ran quickly.”                            |
| Conjoined Adverbial Phrase                 | Adverbial phrase containing at least 2 adverbs                                                                                               | “He climbed the tree slowly and carefully.”         |
| Verb Morphology Errors<br>[reverse scored] | The improper use of a verb, including omission                                                                                               | “He going to brush his teeth.”                      |
| Character Reference                        | Reference to a character by proper name                                                                                                      | “Rachel had an idea.”                               |
| Temporal Ordering                          | Sentence using temporal language (e.g., “first,” “before,” “after,” “then”) to indicate event ordering, not including use of the word “then” | “First, she climbed on the chair.”                  |
| Emotional State                            | Reference to an emotion or emotional behavior                                                                                                | “The cat was <i>happy</i> .”                        |

| Item                         | Description                                                                         | Example                                         |
|------------------------------|-------------------------------------------------------------------------------------|-------------------------------------------------|
| Onomatopoeia                 | A word that imitates the sound of the objects or actions it refers to               | “It went <i>bam bam!</i> ”                      |
| Stress                       | Heightened tone of voice for emphasis                                               | “I screamed and I <i>screamed!!</i> ”           |
| Elongations                  | Exaggeration of the length of a word for emphasis                                   | “It took a <i>loooooong</i> time.”              |
| Repetition                   | Repetition of a word or phrase to add emphasis                                      | “I <i>screamed and screamed and screamed.</i> ” |
| Similes and Metaphors        | Comparison of two unlike things with one another                                    | “His eyes as got as big as tomatoes.”           |
| Gratuitous Terms             | A term adding emphasis without adding information (e.g., “really,” “so,” “just”)    | “She <i>really</i> likes the cookies.”          |
| Time                         | Reference to the time in which the action is taking place                           | “It was <i>bedtime.</i> ”                       |
| Place                        | Reference to place or location of the action                                        | “Bear was <i>in his room.</i> ”                 |
| Direct Quote With Carrier    | Exact words of a character with a statement of who the speaker is (e.g., “he said”) | “‘I am so thirsty,’ he said.”                   |
| Direct Quote Without Carrier | Exact words of a character without a statement of who the speaker is                | “Hmm, that tastes great!”                       |
| Indirect Quote               | Reference to the meaning but not exact words of a character                         | “Bear said that he was thirsty”                 |
| Title                        | Introduction of the story with a title                                              | “Raccoon Makes Lemonade”                        |
| Abstract                     | Summary of the story prior to the narrative                                         | “This is about how to make lemonade.”           |
| Conventional Opening         | Conventional opening of a narrative                                                 | “Once upon a time...” or “One day...”           |
| Establish Setting            | Establishment of the setting of the story (p. 1 of script)                          | “Rachel was playing soccer.”                    |
| Establish Overall goal       | Establishment of the overall goal of the story (p. 2 of script)                     | “Rachel wanted lemonade.”                       |
| Subgoal                      | Statement of subgoals of episodes within the narrative (pp. 3, 7, 11 of script)     | “Rachel brought the lemonade to her friends.”   |

| Item                       | Description                                                                                             | Example                                                                      |
|----------------------------|---------------------------------------------------------------------------------------------------------|------------------------------------------------------------------------------|
| Subproblem                 | Statement of subproblems of episodes within the narrative (pp. 4, 8, 12 of script)                      | “but she didn’t have any cups”                                               |
| Subsolution                | Statement of subsolutions of episodes within the narrative (pp. 5, 9, 13 of script)                     | “She ran inside to get the cups.”                                            |
| Subresolution              | Statement of subresolutions of episodes within the narrative (pp. 6, 10, 14 of script)                  | “Rachel returned with the cups.”                                             |
| Completion of Overall Goal | Statement of completion of the overall goal of the story (p. 15 of script)                              | “Rachel poured lemonade for her friends.”                                    |
| Resolution of Overall Goal | Statement of resolution of the overall goal of the story (p. 16 of script)                              | “They all drank it.”                                                         |
| Conventional Ending        | Conventional ending of a narrative.                                                                     | “The end.”                                                                   |
| Coda                       | General observation of the effect that the narrative had on the narrator or on characters in the story. | “Rachel learned a lesson that day. You’re never too small to make lemonade.” |
